# Supplementary figures and images for: Evolving a 24-hr oscillator in budding yeast
Source: eLife journal article supplement (doi:10.7554/elife.04875), 2014-11-10

# Wildenberg & Murray Figure 1-figure supplement 1

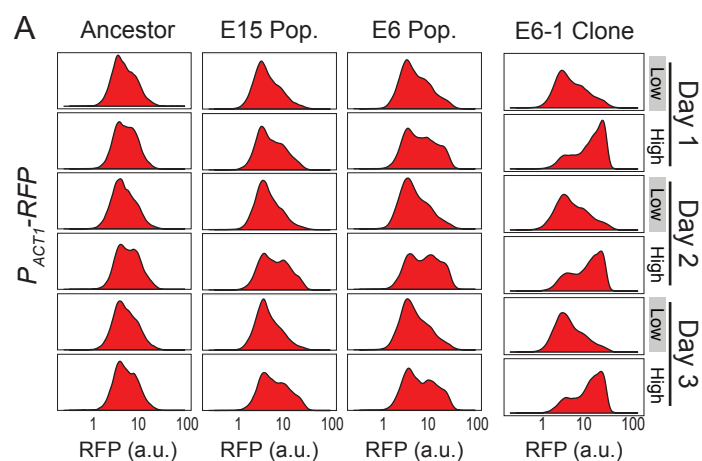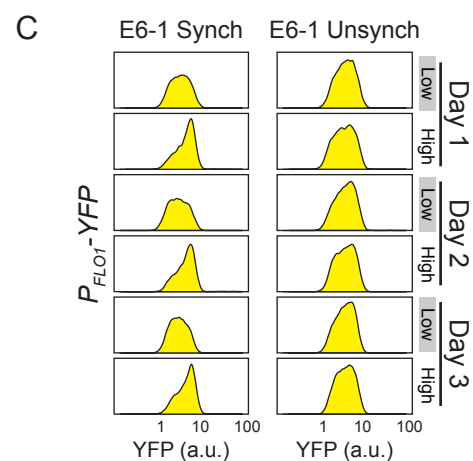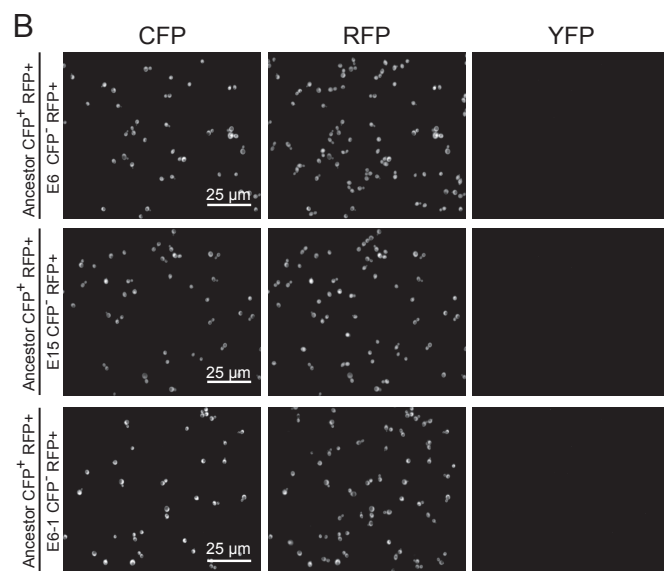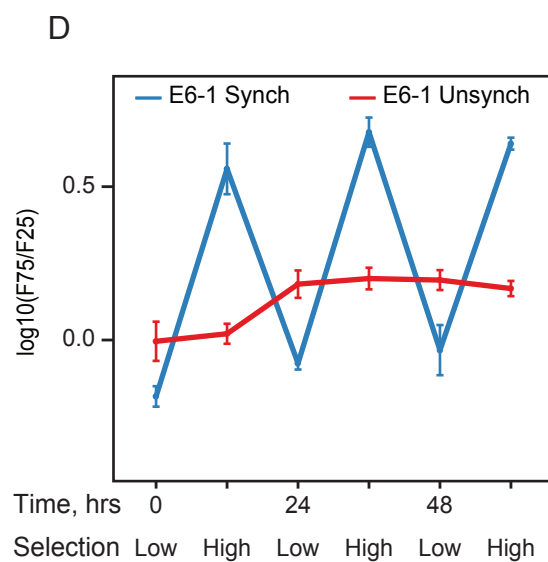

Supplement: supp [file elife_poa_e04875_Figure_1_Figure_Supplement_1.pdf › elife_poa_e04875_Figure_1_Figure_Supplement_1.pdf]

# Wildenberg & Murray Figure 2-figure supplement 1

A

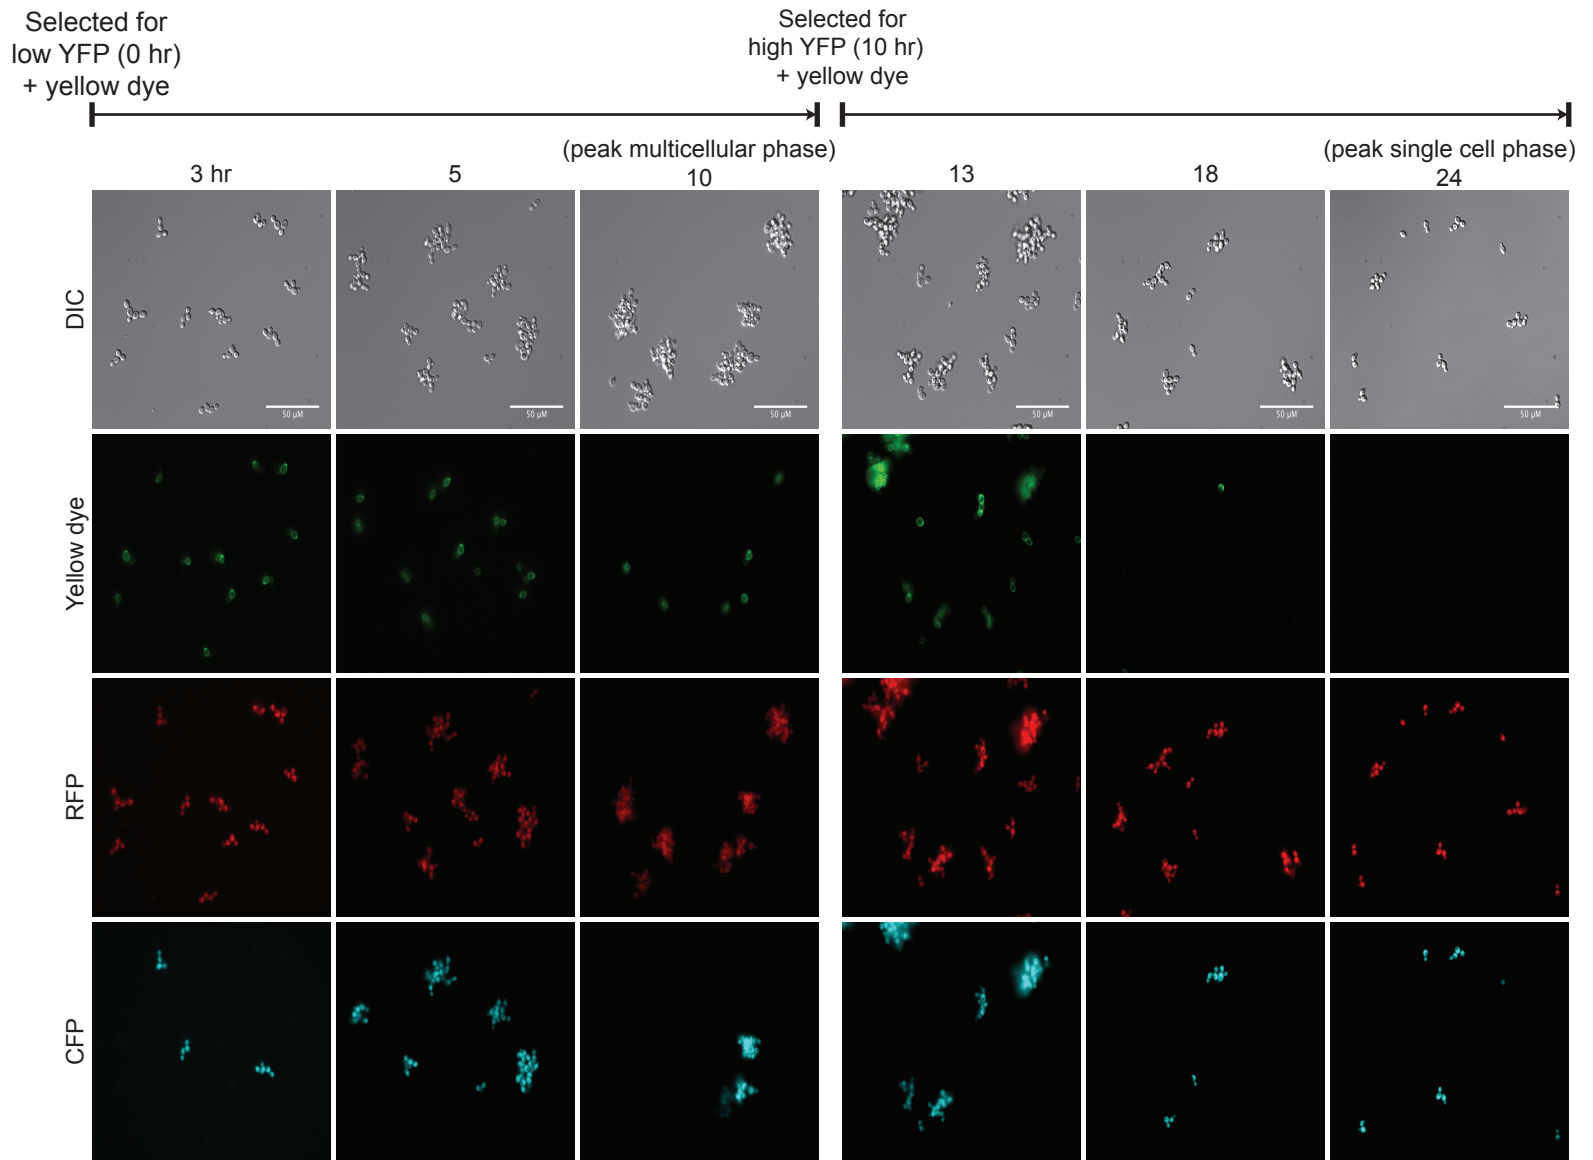

B

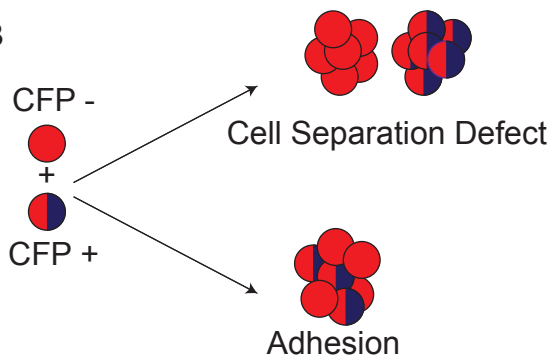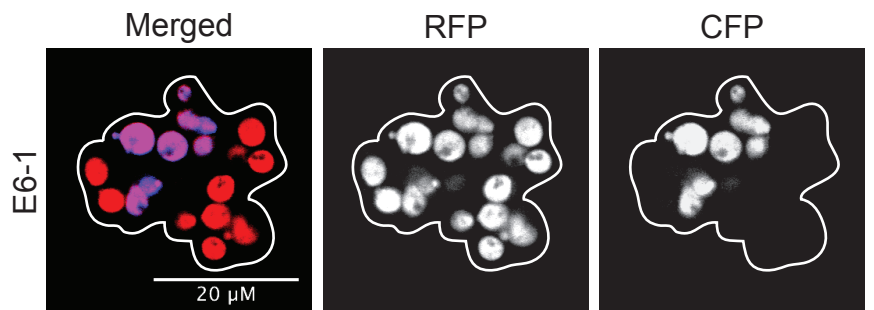

Supplement: supp [file elife_poa_e04875_Figure_2_Figure_Supplement_1.pdf › elife_poa_e04875_Figure_2_Figure_Supplement_1.pdf]

# Wildenberg & Murray Figure 5-figure supplement 1

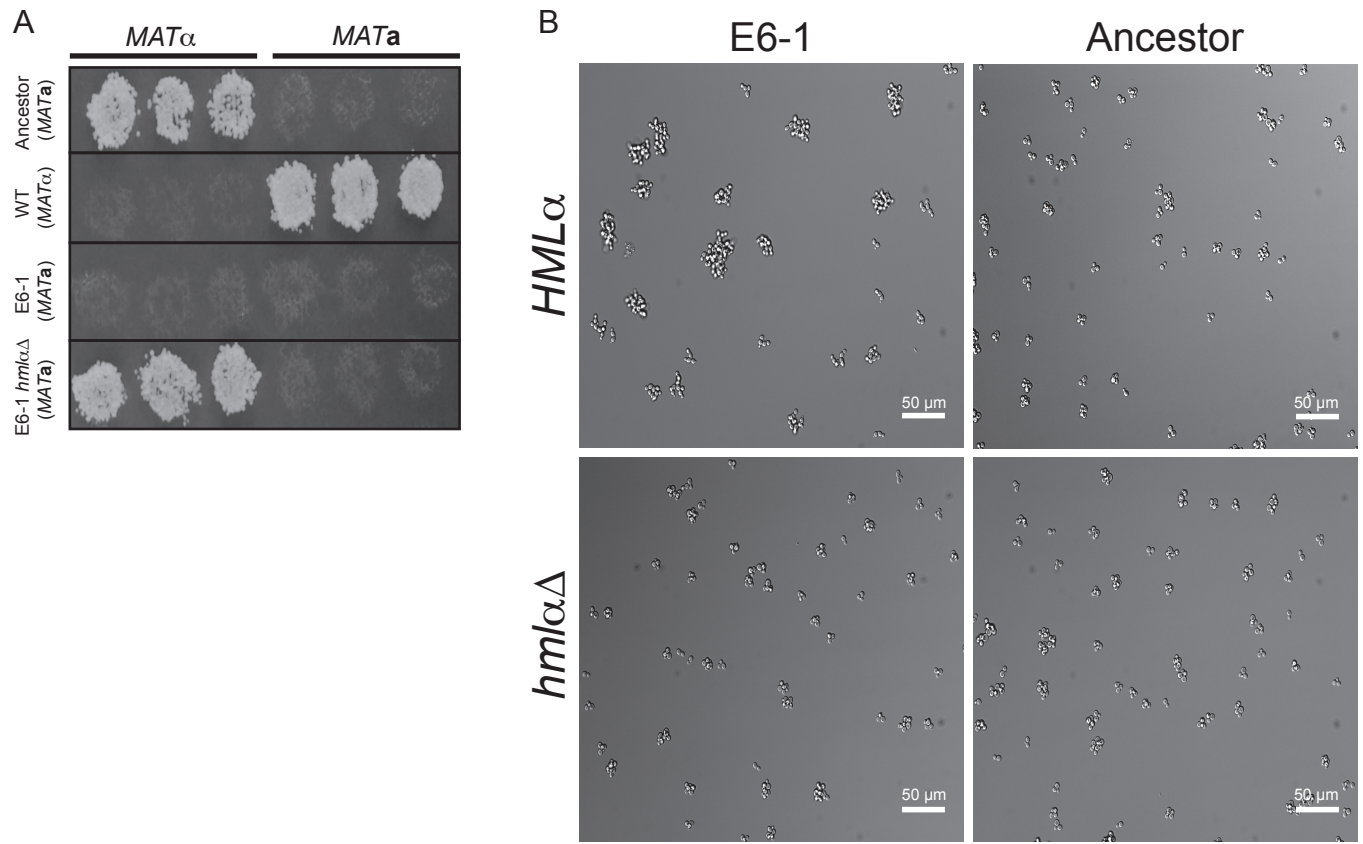

Supplement: supp [file elife_poa_e04875_Figure_5_Figure_Supplement_1.pdf › elife_poa_e04875_Figure_5_Figure_Supplement_1.pdf]
